# Supplementary material for: One-pot biocatalytic upgrading of lignin-derived phenol and catechol to hydroxytyrosol
Source: Royal Society of Chemistry journal article supplement (doi:10.1039/d4gc01137f), 2024-01-01
Supplement: d4gc01137f1.pdf [file d4gc01137f1.pdf]

## Supplementary Material

### One-Pot Biocatalytic Upgrading Lignin-Derived Phenol and Catechol to Hydroxytyrosol

Rui-Yan Zhao,<sup>a</sup> Shuang-Ping Huang,<sup>a</sup> Li-Li Gao,<sup>b</sup> Jian-Dong Zhang<sup>a\*</sup>

<sup>a</sup>*Department of Biological and Pharmaceutical Engineering, College of Biomedical Engineering, Taiyuan University of Technology, Taiyuan, Shanxi 030024, P. R. China*

<sup>b</sup>*College of Environmental Science and Engineering, Taiyuan University of Technology, Taiyuan, Shanxi 030024, China.*

\*Corresponding author: Prof. Jiandong Zhang

Mailing address: College of Biomedical Engineering, Taiyuan University of Technology,

No.79 West Yingze Street, Taiyuan 030024, Shanxi, China

Phone: +86-0351-6018534; Fax: +86-0351-6018534

E-mail: zhangjiandong@tyut.edu.cn

## Table of contents

|                                                                                                                                                                                                                                     |     |
|-------------------------------------------------------------------------------------------------------------------------------------------------------------------------------------------------------------------------------------|-----|
| 1. Chemicals.....                                                                                                                                                                                                                   | S3  |
| 2. Strains, plasmids, and culture conditions.....                                                                                                                                                                                   | S3  |
| 3. Construction of the recombinant <i>E. coli</i> strains.....                                                                                                                                                                      | S3  |
| 4. Gene sequences.....                                                                                                                                                                                                              | S8  |
| 5. Screening of amine transaminases.....                                                                                                                                                                                            | S12 |
| 6. <i>In vitro</i> cascade biocatalysis for conversion of catechol to HT with the cell free extract of <i>E. coli</i> (FnTPL), <i>E. coli</i> (sFTDC), <i>E. coli</i> (TA) and <i>E. coli</i> (yahK) .....                          | S12 |
| 7. <i>In vitro</i> cascade biocatalysis for conversion of catechol to HT with the cell free extract of <i>E. coli</i> (FnTPL), <i>E. coli</i> (LAAD), <i>E. coli</i> (ARO10) and <i>E. coli</i> (yahK) .....                        | S13 |
| 8. <i>In vitro</i> cascade biocatalysis for conversion of catechol to HT with the cell free extract of <i>E. coli</i> (FnTPL), <i>E. coli</i> (HpaBC), <i>E. coli</i> (LAAD), <i>E. coli</i> (ARO10) and <i>E. coli</i> (yahK)..... | S13 |
| 9. Cascade conversion of catechol to HT with the recombinant <i>E. coli</i> resting cells co-expression of FnTPL, sFTDC, TA and yahK .....                                                                                          | S14 |
| 10. Cascade conversion of catechol to HT with the recombinant <i>E. coli</i> resting cells co-expression of FnTPL, LAAD, ARO10 and yahK .....                                                                                       | S14 |
| 11. Cascade conversion of catechol to HT with the recombinant <i>E. coli</i> resting cells co-expression of FnTPL, HpaBC, LAAD, ARO10 and yahK .....                                                                                | S14 |
| 12. Conversion of phenol and catechol to HT with fed-batch strategy.....                                                                                                                                                            | S15 |
| 13. Preparation experiments.....                                                                                                                                                                                                    | S15 |
| 14. Assay method.....                                                                                                                                                                                                               | S16 |
| 15. Table S1. Primers used in this study. ....                                                                                                                                                                                      | S17 |
| 16. Table S2. Strains and plasmids used in this Study .....                                                                                                                                                                         | S18 |
| 17. Figure S1. SDS-PAGE of the cell-free extracts of recombinant <i>E. coli</i> cells co-expression of multiple enzymes.....                                                                                                        | S19 |
| 18. Figure S2. HPLC analysis of HT produced from catechol with the system 1.....                                                                                                                                                    | S20 |
| 19. Figure S3. HPLC analysis of HT produced from catechol with the system 2.....                                                                                                                                                    | S21 |
| 20. Figure S4. HPLC analysis of HT produced from phenol with the system 3.....                                                                                                                                                      | S22 |
| 21. Figure S5. HPLC analysis of HT prepared from catechol and phenol.....                                                                                                                                                           | S23 |
| 22. Figure S6. <sup>1</sup> H NMR spectra analysis of HT.....                                                                                                                                                                       | S24 |
| 23. References.....                                                                                                                                                                                                                 | S25 |

## 1. Chemicals

Catechol, phenol and L-DOPA were from Titan Scientific (Shanghai, China). Hydroxytyrosol, 3,4-dihydroxyphenylpyruvic acid and dopamine were from Bide Pharmatech Ltd (Shanghai, China). Pyridoxal-5'-phosphate (PLP) were from Energy Chemical (Shanghai, China). Tryptone, yeast extract, isopropyl  $\beta$ -D-thiogalactoside (IPTG), kanamycin, ampicillin, streptomycin and Taq plus DNA polymerase were from Sangon Biotech (Shanghai, China). Molecular biological reagents, such as T4 DNA ligase and restriction endonuclease were from New England Biolabs (Beijing, China). Plasmid isolation kit was from Tiangen (Shanghai, China). All other chemicals were of analytical grade and were commercially available.

## 2. Strains, Plasmids, and Culture Conditions

*E. coli* T7 super-competent cells was obtained from New England Biolabs (Beijing, China). The plasmids pET28a, pETduet-1, pCDFduet-1 and pRSFduet-1 for the heterogeneous expression studies were obtained from Novagen (Shanghai, China). The *E. coli* strains were grown at 37°C in Luria–Bertani (LB) medium for 7 h, and then a 250 mL Erlenmeyer flask containing 50 mL of TB medium was inoculated with 1 mL of seed liquid and incubated at 37 °C and 200 rpm. When the optical density (OD) at 600 nm reached 0.6-0.8, IPTG was added to a final concentration of 0.5 mM and cultured overnight (12-14 h) at 20 °C and 200 rpm.

## 3. Construction of the recombinant *E. coli* strains

All the primers used in this study were synthesized by Tsingke (Beijing, China) and list in Table S1. For *E. coli* (pET28a-FnTPL), the gene of tyrosine phenol-lyase (FnTPL) from *Fusobacterium nucleatum* [1] was synthesized by Tsingke (Beijing, China), and the codon of the FnTPL gene sequence was optimized. PCR program settings: initial denaturation at 95°C for 5 min followed by 30 cycles of denaturation at 95°C for 40 s, annealing at 68°C for 40 s, extension at 72°C for 1 min and followed by a final extension at 72°C for 10 min. The PCR product of FnTPL genes were isolated and double-digested with corresponding restriction endonucleases (*Bam*H I, *Not* I), and ligated into the pET28a at the *Bam*H I/*Not* I sites to form the recombinant plasmids pET28a-FnTPL. The recombinant plasmids pET28a-FnTPL was transformed into the competent *E. coli* T7 to form *E. coli* (pET28a-FnTPL).

For *E. coli* (pET28a-sfTDC), the gene of tyrosine decarboxylase (sfTDC) from *Streptococcus faecalis* [2] was synthesized by Tsingke (Beijing, China), and the codon of the sfTDC gene sequence was optimized. PCR program settings: initial denaturation at 95°C for 5 min followed by 30 cycles of denaturation at 95°C for 40 s, annealing at 68°C for 40 s, extension at 72°C for 1 min and followed by a final extension at 72°C for 10 min. The PCR product of sfTDC genes were isolated and digested with corresponding restriction endonucleases (*EcoR* I, *Hind*III), ligated into the pET28a vector to form the recombinant plasmid pET28a-sfTDC. The recombinant plasmid pET28a-sfTDC was transformed into the competent *E. coli* T7 to form *E. coli* (pET28a-sfTDC).

For *E. coli* (pET28a-CepTA), the gene of amine transaminase (CepTA) (EXJ89053.1) from *Capronia epimyces* was synthesized by Tsingke (Beijing, China). PCR program settings: initial denaturation at 95°C for 5 min followed by 30 cycles of denaturation at 95°C for 40 s, annealing at 68°C for 40 s, extension at 72°C for 1 min and followed by a final extension at 72°C for 10 min. The PCR product of CepTA genes were isolated and double-digested with corresponding restriction endonucleases (*Nde* I, *Xho* I), and ligated into the pET28a at the *Nde* I/*Xho* I sites to form the recombinant plasmids pET28a-CepTA. In addition, the recombinant plasmid pET28a-CepTA was transformed into the competent *E. coli* T7 to form *E. coli* (pET28a-CepTA).

For *E. coli* (pET28a-ARO10), the gene of  $\alpha$ -keto acid decarboxylase (ARO10) from *Saccharomyces cerevisiae* [3] was synthesized by Tsingke (Beijing, China), and the codon of the ARO10 gene sequence was optimized. PCR program settings: initial denaturation at 95°C for 5 min followed by 30 cycles of denaturation at 95°C for 40 s, annealing at 68°C for 40 s, extension at 72°C for 1 min and followed by a final extension at 72°C for 10 min. The PCR product of ARO10 genes were isolated and double-digested with corresponding restriction endonucleases (*Bam*H I, *Hind* III), and ligated into the pET28a at the *Bam*H I/*Hind* III sites to form the recombinant plasmids pET28a-ARO10. In addition, the recombinant plasmid pET28a-ARO10 was transformed into the competent *E. coli* T7 to form *E. coli* (pET28a-ARO10).

For *E. coli* (pET28a-LAAD), the gene of L-amino acid deaminase (LAAD) from *Proteus mirabilis* [4] was synthesized by Tsingke (Beijing, China), and the codon of the LAAD gene sequence was optimized. PCR program settings: initial denaturation at 95°C for 5 min followed by 30 cycles of denaturation at 95°C for 40 s, annealing at 68°C for 40 s, extension at 72°C for 1 min and followed by a final extension at 72°C for 10 min. The PCR product of LAAD genes were isolated and digested with

corresponding restriction endonucleases (*Nde* I, *Xho* I), ligated into the pET28a vector to form the recombinant plasmid pET28a-LAAD. The recombinant plasmid pET28a-LAAD was transformed into the competent *E. coli* T7 to form *E. coli* (pET28a-LAAD).

For *E. coli* (pET28a-yahK), the gene of aldehyde reductase (yahK) from *Escherichia coli* [5] was synthesized by Tsingke (Beijing, China), and the codon of the yahK gene sequence was optimized. PCR program settings: initial denaturation at 95°C for 5 min followed by 30 cycles of denaturation at 95°C for 40 s, annealing at 68°C for 40 s, extension at 72°C for 1 min and followed by a final extension at 72°C for 10 min. The PCR product of yahK genes were isolated and digested with corresponding restriction endonucleases (*Bgl* II, *Xho* I), ligated into the pET28a vector to form the recombinant plasmid pET28a-yahK. The recombinant plasmid pET28a-yahK was transformed into the competent *E. coli* T7 to form *E. coli* (pET28a-yahK).

For *E. coli* (pET28a-HpaB), the gene of 4-hydroxyphenylacetate 3-monooxygenase (HpaB) from *Escherichia coli* [6] was synthesized by Tsingke (Beijing, China), and the codon of the HpaB gene sequence was optimized. PCR program settings: initial denaturation at 95°C for 5 min followed by 30 cycles of denaturation at 95°C for 40 s, annealing at 68°C for 40 s, extension at 72°C for 1 min and followed by a final extension at 72°C for 10 min. The PCR product of HpaB genes were isolated and double-digested with corresponding restriction endonucleases (*Bam*H I, *Hind* III), and ligated into the pET28a at the *Bam*H I/*Hind* III sites to form the recombinant plasmids pET28a-HpaB. In addition, the recombinant plasmid pET28a-HpaB was transformed into the competent *E. coli* T7 to form *E. coli* (pET28a-HpaB).

For *E. coli* (pET28a-HpaC), the gene of 4-hydroxyphenylacetate 3-monooxygenase reductase (HpaC) from *Escherichia coli* [6] was synthesized by Tsingke (Beijing, China), and the codon of the HpaC gene sequence was optimized. PCR program settings: initial denaturation at 95°C for 5 min followed by 30 cycles of denaturation at 95°C for 40 s, annealing at 68°C for 40 s, extension at 72°C for 1 min and followed by a final extension at 72°C for 10 min. The PCR product of HpaC genes were isolated and digested with corresponding restriction endonucleases (*Nde* I, *Xho* I), ligated into the pET28a vector to form the recombinant plasmid pET28a-HpaC. The recombinant plasmid pET28a-HpaC was transformed into the competent *E. coli* T7 to form *E. coli* (pET28a-HpaC).

For *E. coli* (pRSFduet-yahK), the plasmid pET28a-yahK was used as template for gene amplification of yahK by PCR. The PCR product of yahK genes were isolated and digested with corresponding

restriction endonucleases (*Bgl* II, *Xho* I), ligated into the pRSFduet-1 vector to form the recombinant plasmid pRSFduet-yahK. The recombinant plasmid pRSFduet-yahK was transformed into the competent *E. coli* T7 to form *E. coli* (pRSFduet-yahK). The recombinant *E. coli* (pCDFduet-yahK) and *E. coli* (pETduet-yahK) were constructed as described above.

For *E. coli* (pRSFduet-FnTPL-yahK), the plasmid pET28a-FnTPL was used as template for gene amplification of FnTPL by PCR. The PCR product of FnTPL genes were isolated and double-digested with corresponding restriction endonucleases (*Bam*H I, *Not* I), and ligated into the pRSFduet-yahK at the *Bam*H I/*Not* I sites to form the recombinant plasmids pRSFduet-FnTPL-yahK (known as RFK). In addition, the recombinant plasmid pRSFduet-FnTPL-yahK was transformed into the competent *E. coli* T7 to form *E. coli* (pRSFduet-FnTPL-yahK) which was named *E. coli* (RFK). The recombinant *E. coli* (pCDFduet-FnTPL-yahK) and *E. coli* (pETduet-FnTPL-yahK) were also constructed as described above.

For *E. coli* (pETDuet-LAAD), the plasmid pET28a-LAAD was used as template for gene amplification of LAAD by PCR. The PCR product of LAAD genes were isolated and digested with corresponding restriction endonucleases (*Nde* I, *Xho* I), ligated into the pETDuet-1 vector to form the recombinant plasmid pETDuet-LAAD. The recombinant plasmid pETDuet-LAAD was transformed into the competent *E. coli* T7 to form *E. coli* (pETDuet-LAAD). The recombinant *E. coli* (pRSFduet-LAAD) was also constructed as described above.

For *E. coli* (pETDuet-ARO10-LAAD), the plasmid pET28a-ARO10 was used as template for gene amplification of ARO10 by PCR. The PCR product of ARO10 genes were isolated and double-digested with corresponding restriction endonucleases (*Bam*H I, *Hind* III), and ligated into the pETDuet-LAAD at the *Bam*H I/*Hind* III sites to form the recombinant plasmids pETDuet-ARO10-LAAD (known as EAL). In addition, the recombinant plasmid pETDuet-ARO10-LAAD was transformed into the competent *E. coli* T7 to form *E. coli* (pETDuet-ARO10-LAAD) which was named *E. coli* (EAL). The recombinant *E. coli* (pRSFduet-ARO10-LAAD) was also constructed as described above.

For *E. coli* (pETDuet-HpaC), the plasmid pET28a-HpaC was used as template for gene amplification of HpaC by PCR. The PCR product of HpaC genes were isolated and digested with corresponding restriction endonucleases (*Nde* I, *Xho* I), ligated into the pETDuet-1 vector to form the recombinant plasmid pETDuet-HpaC. The recombinant plasmid pETDuet-HpaC was transformed into the competent *E. coli* T7 to form *E. coli* (pETDuet-HpaC). The recombinant *E. coli* (pCDFduet-HpaC) was also constructed as described above.

For *E. coli* (pETDuet-HpaB-HpaC), the plasmid pET28a-HpaB was used as template for gene amplification of HpaB by PCR. The PCR product of HpaB genes were isolated and double-digested with corresponding restriction endonucleases (*BamH* I, *Hind* III), and ligated into the pETDuet-HpaC at the *BamH* I/*Hind* III sites to form the recombinant plasmids pETDuet-HpaB-HpaC (known as EBC). In addition, the recombinant plasmid pETDuet-HpaB-HpaC was transformed into the competent *E. coli* T7 to form *E. coli* (pETDuet-HpaB-HpaC) which was named *E. coli* (EBC). The recombinant *E. coli* (pCDFduet-HpaB-HpaC) was also constructed as described above.

For *E. coli* (pRSFDuet-sfTDC), the plasmid pET28a-sfTDC was used as template for gene amplification of sfTDC by PCR. The PCR product of sfTDC genes were isolated and digested with corresponding restriction endonucleases (*EcoR* I, *Hind*III), ligated into the pRSFDuet-1 vector to form the recombinant plasmid pRSFDuet-sfTDC. The recombinant plasmid pRSFDuet-sfTDC was transformed into the competent *E. coli* T7 to form *E. coli* (pRSFDuet-sfTDC).

For *E. coli* (pRSFduet-sfTDC-CepTA), the plasmid pET28a-CepTA was used as template for gene amplification of CepTA by PCR. The PCR product of CepTA genes were isolated and double-digested with corresponding restriction endonucleases (*Nde* I, *Xho* I), and ligated into the pRSFduet-sfTDC at the *Nde* I/*Xho* I sites to form the recombinant plasmids pRSFduet-sfTDC-CepTA (known as RTA). In addition, the recombinant plasmid pRSFduet-sfTDC-CepTA was transformed into the competent *E. coli* T7 to form *E. coli* (pRSFduet-sfTDC-CepTA) which was named *E. coli* (RTA).

For *E. coli* (RFK-EAL), the constructed recombinant plasmids pETDuet-ARO10-LAAD and pRSFduet-FnTPL-yahK were simultaneously transformed into the competent *E. coli* T7 to form the recombinant *E. coli* (pRSFduet-FnTPL-yahK/pETDuet-ARO10-LAAD), designated as *E. coli* (RFK-EAL). The recombinant *E. coli* (CFK-EAL), *E. coli* (CFK-RAL) and *E. coli* (EFK-RAL) were also constructed as described above.

For *E. coli* (CFK-RTA), the constructed recombinant plasmids pRSFduet-sfTDC-CepTA and pCDFduet-FnTPL-yahK were simultaneously transformed into the competent *E. coli* T7 to form the recombinant *E. coli* (pCDFduet-FnTPL-yahK/pRSFduet-sfTDC-CepTA), designated as *E. coli* (CFK-RTA). The recombinant *E. coli* (EFK-RTA) was also constructed as described above.

For *E. coli* (CFK-EBC-RAL), the constructed recombinant plasmids pETDuet-HpaB-HpaC, pRSFduet-ARO10-LAAD and pCDFduet-FnTPL-yahK were simultaneously transformed into the competent *E. coli* T7 to form the recombinant *E. coli* (pCDFduet-FnTPL-yahK/pETDuet-HpaB-

HpaC/pRSFDuet-ARO10-LAAD), designated as *E. coli* (CFK-EBC-RAL). The recombinant *E. coli* (EFK-CBC-RAL) and *E. coli* (RFK-CBC-EAL) were also constructed as described above.

All the constructed recombinant *E. coli* strains were listed in Table S2.

#### 4. Gene Sequences

Gene sequence of FnTPL with codon optimized

```
ATGCGTTTTGAAGATTATCCGGCCGAACCGTTTCGTATTAATCAGTTGAAACCGTTAAAAT
GATCGATAAAGCCGCCCGTGAAGAAGTTATTAAGAAGGCCGTTATAATACCTTTCTGATTA
ATAGCGAAGATGTTTATATCGATCTGCTGACCGATAGCGGTACCAATGCAATGAGCGATAAA
CAGTGGGGTGGTCTGATGCAGGGTGAAGCATATGCCGGTAGCCGTAATTTCTTCCATCT
GGAAGAAACCGTGAAAGAAATTTTCGGTTTTAAACATATCGTTCCGACACATCAGGGTTCGT
GGTGCAGAAAACATTCTGAGCCAGATTGCGATTAAACCGGGTCAGTATGTCCCGGGCAATA
TGTATTTTACCACCACCCGTTATCATCAGGAACGCAATGGTGGCATCTTTAAAGATATTATTC
GTGATGAAGCCCATGATGCCACCCTGAACGTTCCTTTTAAAGGTGATATTGATCTGAACAAA
CTGCAGAAACTGATTGATGAAGTGGGTGCAGAAAATATTGCATATGTTTGTCTGGCAGTTAC
CGTTAACCTGGCAGGCGGTGAGCCGGTTAGCATGAAAAATATGAAAGCAGTCCGTGAACTG
ACAAAGAAGCATGGTATTAAGTATTTTATGATGCCACCCGTTGTGTTGAAAATGCCTATTTT
ATTAAAGAAGCAGGAAGAAGGTTATCAGGATAAAACCATTAAAGAAATCGTGCATGAAATGT
TTTCTATGCAGATGGTTGTACCATGAGTGGCAAGAAGGATTGTCTGGTTAACATTGGCAGGT
TTTCTGTGTATGAATGATGAAGATCTGTTTCTGGCAGCGAAAGAAATTGTTGTTGTTTATGA
AGGTATGCCGAGCTATGGTGGTCTGGCAGGTCGTGATATGGAAGCGATGGCAATTGGTCTG
CGTGAAGCCTGCAGTATGAATATATTCGTCATCGTATTCTGCAGGTTTCGTTATCTGGGTGAA
AAGCTGAAAGAAGCAGGTGTTCCGATTCTGGAACCGGTAGGCGGTCATGCAGTTTTCTGG
ATGCCCGTCGTTTTTGTCCGCATATTCGCAGGAAGAATTTCCAGCCCAGGCACTGGCCGCC
GCAATTTATGTTGAATGTGGTGTTCGTAATGGAACGTGGTATTATTAGTGCTGGTCTGAT
GTTAAAACCGGTGAAAACCATAAACCGAAACTGGAAACCGTTCGTGTTACCATTCGCGGCC
GTGTTTATACGTATAAACATATGGATGTTGTGGCAGAAGGTATTATTAACACTGTATAAACATA
AAGAAGATATCAAACCGCTGGAATTTGTTTATGAACCTAACAGCTGCGTTTCTTCACCGCA
CGCTTTGGTATTAAGAAGTAA
```

Gene sequence of LAAD with codon optimized

```
ATGAACATTTACGTCGCAAGCTGCTGCTGGGTGTTGGTGCTGCTGGTGTGTTGGCGG
GTGGTGCAGCTCTGGTTCCAATGGTGCCTGCTGATGGTAAATTTGTTGAAGCAAAGAG
CCGTGCGAGCTTCGTGGAAGGTACCCAAGGTGCGCTGCCGAAAGAAGCTGACGTTGT
GATTATCGGTGCTGGTATTCAGGGTATCATGACCGCTATTAATCTGGCAGAACGTGGTAT
GAGCGTTACCATTTCTGGAAGGGTCAAATCGCAGGTGAACAGAGCGGTGCTGCGTA
CAGCCAAATTATCAGCTATCAGACCAGCCCGGAAATTTTTCCGCTGCATCACTACGGTA
AAATCCTGTGGCGTGGTATGAACGAAAAGATTGGTGGGATACCAGCTATCGTACCCA
AGGTCGTGTTGAAGCTCTGGCAGATGAAAAGCACTGGACAAGGCGCAGGCTTGGAT
CAAACCGCGAAGGAAGCTGCAGTTTTGACACCCCGCTGAATACCCGTATTATCAA
GGTGAAGAACTGAGCAACCGTCTGGTTGGTGCTCAAACCCCGTGGACCGTGGCTGCT
TTCGAAGAAGATAGCGGTAGCGTTGACCCGGAAACCGGTACCCCGGCACTGGCTCGTT
ACGCTAAACAGATTGGTGTAAAGATCTATAACCAACTGCGCTGTGCGTGGTATTGAAACC
GCGGGTGGTAAAATCAGCGATGTTGTGAGCGAAAAGGTGCGATCAAGACCAGCCAA
```



GTGGTGCTGGCGGGTGGTATTTGGAGCCGTCTGTTTATGGGTAATATGGGTATTGACATC  
CCGACCCTGAACGTTTACCTGAGCCAACAACGTGTTAGCGGTGTGCCAGGTGCGCCGC  
GTGGTAATGTGCATCTGCCGAACGGTATCCACTTTCGTGAACAAGCTGATGGTACCTAT  
GCTGTTGCACCGCGTATTTTCACCAGCAGCATCGTGAAAGACAGCTTCTGCTGGGTC  
CGAAGTTCATGCATCTGCTGGGTGGTGGTGAACCTGCCGCTGGAATTTCTATCGGTGAA  
GACCTGTTAATAGCTTCAAAATGCCGACCAGCTGGAACCTGGACGAAAAGACCCCGT  
TTGAACAATTCCGTGTTGCGACCGCTACCCAAAATACCCAGCACCTGGATGCAGTTTTT  
CAGCGTATGAAAACCGAATTTCCGGTGTTCGAAAAGAGCGAAGTTGTGGAACGTTGG  
GGTGCTGTTGTGAGCCCGACCTTCGACGAACTGCCGATTATCAGCGAAGTTAAGGAAT  
ACCCGGGTCTGGTTATTAACACCGCTACCGTGTGGGGTATGACCGAAGGTCCGGCAGC  
GGGTGAAGTTACCGCAGATATTGTGATGGGTAAAAAGCCGGTTATTGATCCGACCCCGT  
TTAGTTTGGATCGTTTTAAGAAGTAA

Gene sequence of ARO10 with codon optimized

ATGGCACCTGTTACGATTGAAAAGTTTGTAAATCAGGAAGAACGCCATCTGGTTAGCAACC  
GTAGCGCCACCATTCCGTTTGGTGAATATATTTTCAAACGTCTGCTGAGCATTGATACCAAAT  
CCGTGTTTGGTGTGCCGGGTGATTTTAATCTGAGTCTGCTGGAATATCTGTATAGCCCGAGT  
GTTGAAAGCGCCGGTCTGCGTTGGGTGGTACCTGTAATGAACTGAATGCGGCATATGCTG  
CAGATGGTTATAGTCGTTATAGCAATAAAATCGGTTGTCTGATTACCACCTATGGTGTGGTG  
AACTGTCTGCACTGAATGGTATTGCAGGTAGCTTTCAGAAAATGTTAAAGTTCTGCATATC  
GTGGGTGTTGCCAAAAGCATTGATAGCCGTTCTTCTAATTTTAGTGATCGTAATCTGCATCAT  
CTGGTCCGCAGCTGCATGATTCAAATTTTAAAGGCCCGAATCATAAAGTTTATCATGATATG  
GTTAAAGATCGCGTGGCATGTTCTGTTGCATATCTGGAAGATATCGAAACCGCCTGTGATCA  
GGTTGATAACGTTATTCGTGATATCTATAAATATAGTAAACCTGGTTATATCTTTGTTCCGGCA  
GATTTTGCAGATATGAGTGTGACGTGTGATAATCTGGTGAATGTTCCGCGTATTAGTCAGCA  
GGATTGTATTGTTTATCCGAGCGAAAATCAGCTGAGTGATATTATTAATAAAATCACCTCCTG  
GATCTATAGCAGCAAAACACCGGCCATTCTGGGCGATGTCCTGACCGATCGTTATGGTGTTA  
GCAATTTTCTGAATAAACTGATTTGCAAAAACAGGCATTTGGAATTTTCAACCGTTATGGGT  
AAAAGCGTCATTGATGAAAGCAATCCGACCTATATGGGCCAGTATAACGGTAAAGAAGGTC  
TGAAACAGGTGTATGAACATTTGAACTGTGTGATCTGGTTCTGCATTTTGGTGTGATATCA  
ATGAAATTAACAACGGCCATTATACCTTTACATATAAACCAAATGCCAAAATCATCCAGTTTC  
ATCCGAATTATATCCGTCTGGTTGATACTCGTCAGGGTAATGAACAGATGTTTAAAGGTATTA  
ACTTTGCACCGATTCTGAAAGAACTGTATAAACGCATTGATGTTAGCAAACCTGTCCTGCAG  
TATGATAGTAATGTTACGCAGTATACCAATGAAACAATGCGTCTGGAAGATCCGACCAATGG  
TCAGAGCAGCATTATTACCCAGGTGCATCTGCAGAAAACCATGCCGAAATTTCTGAATCCGG  
GTGATGTGGTTGTTTGTGAAACGGGTAGCTTTCAGTTTAGCGTGCGTGATTTTGCATTTCCG  
AGCCAGCTGAAATATATTAGCCAGGGTTTCTCCTGAGTATCGGTATGGCGCTGCCGGCAGC  
ACTGGGTGTTGGTATTGCGATGCAGGATCATTCAAATGCTCATATTAATGGTGGTAATGTTAA  
AGAAGATTATAAACCACGTCTGATTCTGTTTGAAGGTGATGGTGCCGCACAGATGACTATTC  
AGGAACTGAGTACCATTCTGAAATGTAATATTCCTCTGGAAGTTATTATCTGGAATAATAATG  
GTTATAACAATCGAACGTGCAATTATGGGTCCGACACGTAGTTATAATGATGTTATGAGCTGGA  
AATGGACCAAACCTGTTTGAAGCATTGGTGATTTTGTGTTAAATATACAAACAGTACCCTG  
ATTCAGTGTCCAAGCAAACCTGGCACTGAAACTGGAAGAACTGAAAAATAGCAACAAACGT  
AGCGGCATTGAACTGCTGGAAGTAAACTGGGTGAACTGGATTTTCCAGAACAGCTGAAA

TGTATGGTTGAAGCGGCTGCACTGAAACGTAATAAGAAGTAA

Gene sequence of yahK with codon optimized

ATGAAAATCAAAGCCGTCGGTGCATATAGCGCAAAACAGCCGCTGGAACCGATGGATATCA  
CCCGTCGTGAACCGGGTCCGAACGATGTCAAATTGAAATTGCCTATTGTGGTGTGTGTCAT  
AGCGATCTGCATCAGGTTTCGTAGCGAATGGGCAGGTAAGTGTATCCGTGTGTTCCGGGTCA  
TGAAATTGTTGGTCGCGTTGTTGCTGTTGGTGATCAGGTTGAAAAGTATGCCCTGGTGATC  
TGTTGGTGTGGTTGTATTGTTGATAGTTGTAAACATTGTGAAGAATGTGAAGATGGTCTG  
GAAAATTATTGTGATCATATGACGGGTACATATAATAGTCCGACGCCGGATGAACCTGGTCAT  
ACCCTGGGTGGTTATAGCCAGCAGATTGTTGTTTCATGAACGTTATGTGCTGCGTATTCGCCAT  
CCGCAGGAACAGCTGGCAGCAGTTGCACCACTGCTGTGTGCAGGTATTACAACCTATAGCC  
CGCTGCGTCATTGGCAGGCCGGTCCTGGTAAGAAGGTTGGTGTGTTGGCATTGGTGGTCT  
GGTGCATATGGGTATTAAACTGGCACATGCCATGGGTGCGCATGTTGTTGCGTTTACCACTT  
CAGAAGCGAAACGTGAAGCTGCAAAAGCGCTGGGTGCGGATGAAGTGGTGAATAGCCGTA  
ACGCGGATGAAATGGCTGCACATCTGAAAAGCTTTGATTTTATTCTGAACACCGTTGCAGC  
ACCGCATAATCTGGATGATTTTACAACCCTGCTGAAACGTGATGGTACCATGACCCTGGTTG  
GTGCACCGGAACCCCTCATAAATCACCGGAAGTTTTCAATCTGATTATGAAACGTCGTGCA  
ATCGCCGGTAGTATGATTGGCGGCATTCCGGAAACCCAGGAAATGCTGGATTTTTGTGCAGA  
ACATGGCATTGTTGCGGATATTGAAATGATCCGTGCCGATCAGATCAATGAAGCATATGAAC  
GTATGCTGCGTGGTGTATGTTAAATATCGCTTTGTTATTGATAACCGTACCCTGACCGATTAA

Gene sequence of sfTDC with codon optimized

ATGAAAATGAAAAGCTGGCAAAAGGTGAAATGAACCTGAATGCGCTGTTTATCGGCGATA  
AAGCAGAAAATGGTCAGCTGTATAAAGATCTGCTGATTGATCTGGTTGATGAACATCTGGGC  
TGGCGTCAGAATTATATGCCGCAGGATATGCCTGTTATTTCAAGTCAGGAACGTACCAGCGA  
AAGCTATGAAAAGACCGTGAATCATATGAAAGATGTGCTGAATGAAATCAGCAGTCGTATG  
CGTACCCATTCCGTTCCATGGCATAACCGCAGGCCGTTATTGGGGTCATATGAATAGCGAAAC  
CCTGATGCCAAGCCTGCTGGCGTATAATTTTGAATGCTGTGGAATGGCAATAACGTTGCAT  
ATGAAAGTAGCCCGGCCACCAGTCAGATGGAAGAAGAAGTCGGTCATGAATTTGCACATCT  
GATGTCATATAAAAACGGCTGGGGTCATATTGTTGCGGATGGTAGCCTGGCGAATCTGGAAG  
GTCTGTGGTATGCACGCAACATTAAGCCTGCCTTTTGAATGAAAGAAGTTAAACCGGA  
ACTGTTGCAGGTAAAAGCGATTGGGAAGTCTGAATATGCCTACCAAAGAAATTATGGAT  
CTGCTGGAAGCGCAGAAGATGAAATCGATGAAATTAAGCACATAGCGCACGTAGCGGTA  
AACATCTGCAGGCAATTGGTAAATGGCTGGTCCGCAGACCAAACATTATAGCTGGCTGAA  
AGCAGCAGATATTATTGGTATTGGTCTGGATCAGGTTATTCCGGTTCCTGTTGATCATAATTAT  
CGTATGGATATTAACGAACTGGAAGAGATTGTTTCGTGGTCTGGCAGAAGAACAGATTCCGG  
TTCTGGGTGTTGTGGGTGTTGTTGGTAGTACCGAAGAAGGTGCGGTTGATAGTATTGATAAA  
ATTATTGCACTGCGTGATGAACTGATGAAAGATGGTATTTATTATTATGTTTCATGTTGATGCGG  
CGTATGGTGGTTATGGTCGCGCAATTTTCCCTGGATGAAGATAATAACTTTATCCCGTATGAAG  
ATCTGCAGGATGTTTCATGAAGAATATGGTGTTTTCAAAGAAAAGAAGGAACATATTTCCCGT  
GAAGTTTATGATGCATATAAAGCAATTGAACTGGCAGAAAGCGTGACCATTGATCCGCATAA  
AATGGGTATATTCCGTATAGCGCAGGTGGCATTGTGATTCAGGATATTCGTATGCGTGATGT  
GATTAGTTATTTTGAACCTATGTTTTCGAAAAGGGTGCCGATATCCGGCCCTGCTGGGTG  
CATATATTCTGGAAGGTAGCAAAGCAGGTGCAACCGCAGCAAGCGTTTGGGCAGCACATCA

TGTTCTGCCTCTGAATGTTGCAGGTTATGGTAAACTGATTGGTGCAAGCATCGAAGGTTCCC  
ATCATTTTTATAATTTCTGAACGATCTGACCTTTAAAGTTGGTGATAAAGAAATTGAAGTTC  
ATACCCTGACCCATCCGGATTTTAATATGGTTGATTATGTTTTCAAAGAAAAGGGTAACGATG  
ATCTGGTTGCCATGAATAAACTGAATCATGATGTTTATGATTATGCCAGCTATGTCAAAGGTA  
ATATTTATAATAACGAATTTATCACAAGTCATACAGATTTTGCAATCCCGGATTATGGTAATAG  
CCCGCTGAAATTTGTGAACAGCCTGGGTTTTAGCGATGAAGAATGGAACCGTGCGGGCAA  
AGTCACCGTGCTGCGTGCAGCAGTTATGACCCCGTATATGAATGATAAAGAAGAATTTGATG  
TTTATGCACCGAAAATTCAGGCTGCGCTGCAGGAAAAGCTGGAACAGATTTATGATGTAA  
ATAA

Gene sequence of HpaB with codon optimized

ATGAAACCGGAAGATTTTCGCGCCAGCACCCAGCGTCCGTTTACCGGTGAAGAATATCTGA  
AAAGCCTGCAGGATGGTTCGTGAAATTTATATTTATGGCGAACGTGTTAAAGATGTGACCACC  
CATCCGGCTTTTTCGTAATGCAGCAGCAAGCGTTGCACAGCTGTATGATGCCCTGCATAAACC  
TGAAATGCAGGATAGCCTGTGTTGGAATACAGATACTGGTAGCGGTGGTTATACCCATAAAT  
TCTTCCGTGTTGCAAAAAGTGCAGATGATCTGCGTCAGCAGCGTGATGCAATTGCCGAATG  
GAGCCGTCTGAGCTATGGTTGGATGGTTCGCACACCAGATTATAAAGCAGCATTGTTGGTTGTG  
CACTGGGTGCGAATCCGGGTTTTTATGGTCAGTTTGAACAGAATGCGCGTAATTGGTATACC  
CGTATTCAGGAAACGGGCCTGTATTTAATCATGCTATCGTTAATCCGCCGATTGATCGTCAT  
CTGCCAACAGATAAAGTTAAAGATGTTTATATCAAACCTGGAAGGAAACCGATGCAGGTA  
TTATTGTTAGCGGTGCCAAAGTTGTTGCAACCAATAGCGCACTGACCCATTATAATATGGTCG  
GCTTTGGTAGCGCACAGGTTATGGGCGAAAATCCGGATTTTGCCTGATGTTTGTGACCCG  
ATGGATGCAGATGGTGTTAAACTGATCTCCCGTGCATCCTATGAAATGGTTGCAGGTGCCAC  
AGGTTACCATATGATTATCCTCTGTCTAGCCGTTTTGATGAAAATGATGCAATTCTGGTTAT  
GGATAATGTGCTGATTCCGTGGGAAAACGTTCTGATTTATCGTGATTTTGATCGTTGTCTGTCG  
TTGGACCATGGAAGGTGGTTTTTGCGCGTATGTATCCGCTGCAGGCGTGTGTTTCGTCTGGCAG  
TTAAACTGGATTTTATTACCGCACTGCTGAAGAAGAGTCTGGAATGTACGGGTACACTGGA  
ATTTTCGTGGTGTTTCAGGCAGATCTGGGCGAAGTTGTTGCGTGCGTAATACTTTTGGGCC  
TGAGTGATAGCATGTGTAGCGAAGCAACCCCGTGGGTTAATGGCGCATATCTGCCGGATCAT  
GCAGCACTGCAGACCTATCGTGTGCTGGCCCTATGGCATATGCAAAAATTAATAATATCAT  
CGAACGTAACGTTACCTCAGGCCTGATTTATCTGCCGAGCTCTGCCCGTGATCTGAATAATC  
CTCAGATTGATCAGTATCTGGCAAATATGTTTCGTGGTAGCAATGGTATGGATCATGTGCAGC  
GCATTAAAATTCTGAAACTGATGTGGGATGCAATCGGTAGCGAATTTGGCGGTCTGCATGAA  
CTGTATGAAATTAATTATAGCGGTAGCCAGGATGAAATTCGTCTGCAGTGTCTGCGTCAGGC  
ACAGAGCAGCGGTAACATGGATAAAATGATGGCAATGGTGGATCGTTGTCTGAGCGAATAT  
GATCAGAACGGTTGGACAGTTCCACATCTGCATAATAATGATGATATCAATATGCTGGATAAA  
CTGCTGAAATAA

Gene sequence of HpaC with codon optimized

ATGCAGCTGGATGAACAGCGTCTGCGCTTTTCGTGATGCCATGGCCAGCCTGAGCGCCGCAG  
TTAATATTATTACCACCGAAGGTGATACCGGTCAGTGTGGTATCACCGCCACCGCAGTTTGT  
AGCGTTACCGATACCCCGCCTAGCCTGATGGTTTGTATTAATGCCAATTCAGCAATGAACCC  
GGTTTTCCAGGGTAATGGTAAACTGTGTGTTAATGTTCTGAATCATGAACAGGAACTGATGG  
CACGTCATTTTCCCGGATGACGGGTATGGCCATGGAAGAACGTTTTAGCCTGAGTTGTTGG

CAGAAAGGTCCGCTGGCCCAGCCAGTTCTGAAAGGTAGCCTGGCAAGCCTGGAAGGTGAA  
ATTCGTGATGTTCAAGCAATTGGTACCCATCTGGTGTATCTGGTTGAAATTAATAATATCATC  
CTGAGCGCAGAAGGTCATGGTCTGATCTATTTTAAACGTCGTTTTTCATCCGGTTATGCTGGA  
AATGGAAGCAGCGATTTAA

Gene sequence of CepTA

ATGGCTTCGATGGACAAGGTGTTTGCCGGCTATCAGTCGCGGCTGCGGGTGTGGAGGCGA  
GCACCAACCCGCTGGCGCAGGGCGTGGCGTGGATCGAAGGCGAGCTGGTGCCGCTGTTCG  
AGGCGCGCATCCCCGCTGATGGACCAAGGCTTCCTGCACAGCGACCTGACGTACGACGTGC  
CCGCGGTGTGGGATGGCCGCTTCTTCCGGCTGGACGATCACATCAGCCGGCTGGAGAAGA  
GCTGCAGCAAGCTGCGGCTGAAGCTGCCCTTGCCGCGCGACGAGGTGAAGCGAGTGCTGG  
TCGACATGGTGGCGCGGAGCGGGATCCGCGACGCCTTTGTTCGAGCTGATCGTCACGCGCGG  
GCTCACGGGCGTGCCTGGCGCCGGCCGCCCCGAAGACCTGGTCAACAACCTCTACATGTT  
CCTGCAGCCCTATCTCTGGGTCATGCCGCCGAAACCCAGCTGGTTCGGGGGACGCGCCGTC  
ATCACCCGCACGGTGCAGCGCACGCCGCCGGGCTCGATGGATCCGACGGTCAAGAACCTG  
CAATGGGGCGACCTGACCAGAGCGTTGTTGGAGGCCTCCGACCGCGGCGCCAGCTATCCCT  
TCCTGACCGACGGCGACGCCAACATCACCGAGGGCTCCGGCTACAACATTGTCTGATCAA  
GGACGGAGCCATCCACACTCCGGACCGTGGTGTCTGGAGGGCGTCACGCGCAAGACCGT  
CTTCGACATTGCAAAGGCCAATGGCTTTGAGGTCCGTCTGGAAGTCGTCCTCCGTCGAGCTG  
GCCTACCGCGCCGACGAGATCTTCATGTGCACCACCGCCGGCGGGATCATGCCTATCACCTC  
CCTGGACGGCCAGCCCGTGAACGGTGGCCAGATCGGCCCATCACCAAGAAGATCTGGGA  
CGACTATTGGGCTTTGCATTACGATCCAGCCTTTAGCTTCGAGATCAAGTACGACGAGGCTG  
GGGCTTCCACGAACGGTGTCAATGGCGTGCACAAGTGA

## 5. Screening of amine transaminases

To identify suitable ATA biocatalysts, multiple ATAs available in our lab were screened using dopamine as a substrate. The standard reaction mixture was Tris-HCl buffer (50 mM, pH 8.0) containing 10 mM dopamine, 0.1 mM PLP, 10 mM sodium pyruvate and 15 g cdw/L *E. coli* (ATA) resting cells. The reactions were incubation for 6 h at 30 °C, and 200 rpm shaking. The reaction solution (100 µL) was mixed well with acetonitrile (900 µL) containing 2 mM benzaldehyde (internal standard) and centrifuged at 12,000 rpm for 5 minutes. The obtained supernatant filtered through the 0.22 µm filters and submitted to HPLC analysis.

## 6. *In vitro* cascade biocatalysis for conversion of catechol to HT with the cell free extract of *E. coli* (FnTPL), *E. coli* (sfTDC), *E. coli* (CepTA) and *E. coli* (yahK)

In the enzyme cascade reaction of FnTPL-sfTDC-TA-yahK, the cascade combining the four steps in a concurrent one-pot fashion was investigated with the cell free extract of *E. coli* (FnTPL), *E. coli* (sfTDC),

*E. coli* (CepTA) and *E. coli* (yahK). The standard reaction mixture was Tris-HCl buffer (50 mM, pH 8.0) containing 10 mM catechol, 0.1 mM PLP, 40 mM sodium pyruvate, 200 mM NH<sub>4</sub>Cl, 15 mg/mL FnTPL, 15 mg/mL sFTDC, 15 mg/mL CepTA and 15 mg/mL yahK, 0.5 mM NADH, 10 U glucose dehydrogenase (GDH), 50 mM glucose. The reactions were incubation for 24 h at 30 °C, and 200 rpm shaking. The reaction solution (100 µl) was mixed well with acetonitrile (900 µl) containing 2 mM benzaldehyde (internal standard) and centrifuged at 12,000 rpm for 5 minutes. The obtained supernatant filtered through the 0.22 µm filters and submitted to HPLC analysis.

#### **7. *In vitro* cascade biocatalysis for conversion of catechol to HT with the cell free extract of *E. coli* (FnTPL), *E. coli* (LAAD), *E. coli* (ARO10) and *E. coli* (yahK)**

In the enzyme cascade reaction of FnTPL-LAAD-ARO10-yahK, the cascade combining the four steps in a concurrent one-pot fashion was investigated with the cell free extract of *E. coli* (FnTPL), *E. coli* (LAAD), *E. coli* (ARO10) and *E. coli* (yahK). The standard reaction mixture was Tris-HCl buffer (50 mM, pH 8.0) containing 10 mM catechol, 0.1 mM PLP, 40 mM sodium pyruvate, 200 mM NH<sub>4</sub>Cl, 15 mg/mL FnTPL, 15 mg/mL LAAD, 15 mg/mL ARO10 and 15 mg/mL yahK, 0.5 mM NADH, 10 U GDH, 50 mM glucose. The reactions were incubation for 24 h at 30 °C, and 200 rpm shaking. The reaction solution (100 µL) was mixed well with acetonitrile (900 µL) containing 2 mM benzaldehyde (internal standard) and centrifuged at 12,000 rpm for 5 minutes. The obtained supernatant filtered through the 0.22 µm filters and submitted to HPLC analysis.

#### **8. *In vitro* cascade biocatalysis for conversion of phenol to HT with the cell free extract of *E. coli* (FnTPL), *E. coli* (HpaBC), *E. coli* (LAAD), *E. coli* (ARO10) and *E. coli* (yahK)**

In the enzyme cascade reaction of FnTPL-HpaBC-LAAD-ARO10-yahK, the cascade combining the four steps in a concurrent one-pot fashion was investigated with the cell free extract of *E. coli* (FnTPL), *E. coli* (HpaBC), *E. coli* (LAAD), *E. coli* (ARO10) and *E. coli* (yahK). The standard reaction mixture was Tris-HCl buffer (50 mM, pH 8.0) containing 10 mM phenol, 0.1 mM PLP, 40 mM sodium pyruvate, 200 mM NH<sub>4</sub>Cl, 15 mg/mL FnTPL, 10 mg/mL HpaB, 10mg/mL HpaC, 15mg/mL LAAD, 15 mg/mL ARO10 and 15 mg/mL yahK, 0.5 mM NADH, 10 U GDH, 50 mM glucose. The reactions were incubation for 24 h at 30 °C, and 200 rpm shaking. The reaction solution (100 µL) was mixed well with acetonitrile (900

μL) containing 2 mM benzaldehyde (internal standard) and centrifuged at 12,000 rpm for 5 minutes. The obtained supernatant filtered through the 0.22 μm filters and submitted to HPLC analysis.

#### **9. Cascade conversion of catechol to HT with the recombinant *E. coli* resting cells co-expression of FnTPL, sFTDC, CepTA and yahK**

The recombinant *E. coli* (CFK-RTA) and *E. coli* (EFK-RTA) induced overnight were collected by centrifugation for 5 min at 4 °C and 8000 rpm, then washed twice with Tris-HCl buffer (50 mM, pH 8.0). The obtained cells were suspended with 50 mM Tris-HCl buffer (pH 8.0) to a cell density of 15 g CDW L<sup>-1</sup>. The standard reaction mixture was containing 10 mM catechol, 0.1 mM PLP, 40 mM sodium pyruvate, 200 mM NH<sub>4</sub>Cl. The reaction mixtures were shaken at 200 rpm at 30°C. The samples were collected at regular intervals. The reaction solution (100 μL) was mixed well with acetonitrile (900 μL) containing 2 mM benzaldehyde (internal standard) and centrifuged at 12,000 rpm for 5 minutes. The obtained supernatant filtered through the 0.22 μm filters and submitted to HPLC analysis.

#### **10. Cascade conversion of catechol to HT with the recombinant *E. coli* resting cells co-expression of FnTPL, LAAD, ARO10 and yahK**

The recombinant *E. coli* (RFK-EAL), *E. coli* (CFK-EAL), *E. coli* (CFK-RAL) and *E. coli* (EFK-RAL) induced overnight were collected by centrifugation for 5 min at 4 °C and 8000 rpm, then washed twice with Tris-HCl buffer (50 mM, pH 8.0). The obtained cells were suspended with 50 mM Tris-HCl buffer (pH 8.0) to a cell density of 15 g CDW L<sup>-1</sup>. The standard reaction mixture was containing 10 mM catechol, 0.1 mM PLP, 40 mM sodium pyruvate, 200 mM NH<sub>4</sub>Cl. The reaction mixtures were shaken at 200 rpm at 30°C. The samples were collected at regular intervals. The reaction solution (100 μL) was mixed well with acetonitrile (900 μL) containing 2 mM benzaldehyde (internal standard) and centrifuged at 12,000 rpm for 5 minutes. The obtained supernatant filtered through the 0.22 μm filters and submitted to HPLC analysis.

#### **11. Cascade conversion of phenol to HT with the recombinant *E. coli* resting cells co-expression of FnTPL, HpaBC, LAAD, ARO10 and yahK**

The recombinant *E. coli* (CFK-EBC-RAL), *E. coli* (EFK-CBC-RAL) and *E. coli* (RFK-CBC-EAL) induced overnight were collected by centrifugation for 5 min at 4 °C and 8000 rpm, then washed twice

with Tris-HCl buffer (50 mM, pH 8.0). The obtained cells were suspended with 50 mM Tris-HCl buffer (pH 8.0) to a cell density of 15 g CDW L<sup>-1</sup>. The standard reaction mixture was containing 10 mM phenol, 0.1 mM PLP, 40 mM sodium pyruvate, 200 mM NH<sub>4</sub>Cl. The reaction mixtures were shaken at 200 rpm at 30°C. The samples were collected at regular intervals. The reaction solution (100 µL) was mixed well with acetonitrile (900 µL) containing 2 mM benzaldehyde (internal standard) and centrifuged at 12,000 rpm for 5 minutes. The obtained supernatant filtered through the 0.22 µm filters and submitted to HPLC analysis.

### **12. Conversion of phenol and catechol to HT with fed-batch strategy**

The standard reaction mixture was containing 10 mM catechol or phenol, 120 mM sodium pyruvate, 600 mM NH<sub>4</sub>Cl, 15 g CDW L<sup>-1</sup> of *E. coli* (RFK-EAL) or 25 g cdw /L *E. coli* (CFK-EBC-RAL) at pH 8.0 and 30 °C. The strategy commences with an initial substrate concentration of 10 mM, followed by the addition of 10 mM substrate when the substrate is almost gone for a total of 2 feedings, resulting in a final substrate concentration of 30 mM. The samples were collected at regular intervals. The reaction solution (100 µL) was mixed well with acetonitrile (900 µL) containing 2 mM benzaldehyde (internal standard) and centrifuged at 12,000 rpm for 5 minutes. The obtained supernatant filtered through the 0.22 µm filters and submitted to HPLC analysis.

### **13. Preparation experiments**

Using the fed-batch method, preparative experiments were conducted on a 100 mL scale with the constructed recombinant *E. coli* (RFK-EAL) and *E. coli* (CFK-EBC-RAL) resting cells. The initial reaction conditions are: 10 mM catechol or phenol, 120 mM sodium pyruvate, 600 mM NH<sub>4</sub>Cl, 15 g CDW L<sup>-1</sup> of *E. coli* (RFK-EAL) or 25 g CDW L<sup>-1</sup> *E. coli* (CFK-EBC-RAL) at pH 8.0 and 30 °C. 10 mM catechol or phenol was added when the substrate is almost gone for a total of 2 feedings. After the reactions were finished, the reaction mixtures were extracted with ethyl acetate (EtOAc) (50 mL) for three times. The combined organic phases were dried over anhydrous Na<sub>2</sub>SO<sub>4</sub>. The solvent was removed by evaporation and the crude products were purified by flash chromatography on a silica gel column to give HT as a yellow oily. <sup>1</sup>H NMR (600 MHz, CD<sub>3</sub>OD) δ 6.67 (d, J = 8.0 Hz, 1H), 6.65 (d, J = 2.0 Hz, 1H), 6.52 (dd, J = 8.0, 2.1 Hz, 1H), 3.67 (t, J = 7.3 Hz, 2H), 2.66 (t, J = 7.2 Hz, 2H).

#### **14. Analytical Methods**

The determination of both standards and products was performed with a Shimadzu HPLC LC-10A system equipped with an ultraviolet absorption detector (SPD) and reversed-phase C18 column (4.6 mm × 250 mm × 5 μm, Phenomenex, Shanghai) at 30°C. The mobile phase consisted of A (0.1% trifluoroacetic acid in acetonitrile) and B (0.1 % trifluoroacetic acid in water) and maintained A: B = 50: 50 for 10 min. The detection wavelength and flow rate were controlled at 210 nm and 1 mL/min. The injection volume of each sample was 20 μL.



**Table S1.** Primers used in this study.

| Entry | Names   | Primers (5'-3')                                                 | REA <sup>a</sup> |
|-------|---------|-----------------------------------------------------------------|------------------|
| 1     | FnTPL-F | CGC <b>GGATCC</b> GATGCGTTTTGAAGATTATCCGGC                      | <i>Bam</i> HI    |
| 2     | FnTPL-R | AAGGAAAAA <b>AGCGGCCGCTT</b> ACTTCTTAATACCAAAGCGTGCGG           | <i>Not</i> I     |
| 3     | CepTA-F | GGGAATTCC <b>CATATG</b> GCTTCGATGGACAAGGTGTTTGCCG               | <i>Nde</i> I     |
| 4     | CepTA-R | CCG <b>CTCGAGTCA</b> CTTGTGACGCCATTGACACC                       | <i>Xho</i> I     |
| 5     | yahK-F  | GGA <b>AGATCT</b> CATGAAAATCAAAGCCGTCGGTGCATATAGCGC             | <i>Bgl</i> II    |
| 6     | yahK-R  | CCG <b>CTCGAGT</b> TAAATCGGTCAGGTTACGGTTATCAATAAC               | <i>Xho</i> I     |
| 7     | sfTDC-F | CCG <b>GAATTC</b> GATGAAAAATGAAAAGCTGGCAAAAAGGTGAAATGA<br>ACC   | <i>Eco</i> RI    |
| 8     | sfTDC-R | CCC <b>AAGCTTT</b> TATTTAACATCATAAATCTGTTCCAGCTTTTCCTGC<br>AGCG | <i>Hind</i> III  |
| 9     | ARO10-F | CGC <b>GGATCC</b> GATGGCACCTGTTACGATTGAAAAGTTTG                 | <i>Bam</i> HI    |
| 10    | ARO10-R | CCC <b>AAGCTTT</b> TACTTCTTATTACGTTTCAGTGCAGCCGC                | <i>Hind</i> III  |
| 11    | LAAD-F  | GGGAATTCC <b>CATATGA</b> ACATTTACGTCGCAAGCTGCTGC                | <i>Nde</i> I     |
| 12    | LAAD-R  | CCG <b>CTCGAGT</b> TACTTCTTAAAACGATCCAAACTAAACGGGG              | <i>Xho</i> I     |
| 13    | HpaB-F  | CGC <b>GGATCC</b> GATGAAACCGGAAGATTTTCGC                        | <i>Bam</i> HI    |
| 14    | HpaB-R  | CCC <b>AAGCTTT</b> TATTTTCAGCAGTTTATCCAGCATATTGATATCATC         | <i>Hind</i> III  |
| 15    | HpaC-F  | GGGAATTCC <b>CATATG</b> CAGCTGGATGAACAGCGTCTGC                  | <i>Nde</i> I     |
| 16    | HpaC-R  | CCG <b>CTCGAGT</b> TAAATCGCTGCTTCCATTTCCAGCATAACC               | <i>Xho</i> I     |

<sup>a</sup> REA: restriction endonuclease

**Table S2.** Strains and plasmids used in this study.

| <b>Recombinant <i>E. coli</i></b> | <b>Recombinant plasmid</b>                           | <b>Enzyme expressed</b>                   | <b>Reference</b> |
|-----------------------------------|------------------------------------------------------|-------------------------------------------|------------------|
| <i>E. coli</i> (FnTPL)            | pET28a-FnTPL                                         | FnTPL ( <i>Fusobacterium nucleatum</i> )  | [1]              |
| <i>E. coli</i> (sfTDC)            | pET28a-sfTDC                                         | sfTDC ( <i>Streptococcus faecalis</i> )   | [2]              |
| <i>E. coli</i> (CepTA)            | pET28a-CepTA                                         | CepTA ( <i>Capronia epimyces</i> )        | this study       |
| <i>E. coli</i> (ARO10)            | pET28a-ARO10                                         | ARO10 ( <i>Saccharomyces cerevisiae</i> ) | [3]              |
| <i>E. coli</i> (LAAD)             | pET28a-LAAD                                          | LAAD ( <i>Proteus mirabilis</i> )         | [4]              |
| <i>E. coli</i> (yahK)             | pET28a-yahK                                          | yahK ( <i>Escherichia coli</i> )          | [5]              |
| <i>E. coli</i> (HpaC)             | pET28a-HpaC                                          | HpaC ( <i>Escherichia coli</i> )          | [6]              |
| <i>E. coli</i> (HpaB)             | pET28a-HpaB                                          | HpaB ( <i>Escherichia coli</i> )          | [6]              |
| <i>E. coli</i> (CFK)              | pCDFDuet-FnTPL-yahK                                  | FnTPL and yahK                            | this study       |
| <i>E. coli</i> (RFK)              | pRSFDuet-FnTPL-yahK                                  | FnTPL and yahK                            | this study       |
| <i>E. coli</i> (EFK)              | pETDuet-FnTPL-yahK                                   | FnTPL and yahK                            | this study       |
| <i>E. coli</i> (EAL)              | pETDuet-ARO10-LAAD                                   | ARO10 and LAAD                            | this study       |
| <i>E. coli</i> (RAL)              | pRSFDuet-ARO10-LAAD                                  | ARO10 and LAAD                            | this study       |
| <i>E. coli</i> (RTA)              | pRSFDuet-sfTDC-CepTA                                 | sfTDC and CepTA                           | this study       |
| <i>E. coli</i> (CBC)              | pCDFDuet-HpaB-HpaC                                   | HpaB and HpaC                             | this study       |
| <i>E. coli</i> (EBC)              | pETDuet-HpaB-HpaC                                    | HpaB and HpaC                             | this study       |
| <i>E. coli</i> (CFK-RTA)          | pRSF-sfTDC-CepTA pCDF-<br>FnTPL-yahK                 | FnTPL, sfTDC, CepTA and yahK              | this study       |
| <i>E. coli</i> (EFK-RTA)          | pRSF-sfTDC-CepTA pET-<br>FnTPL-yahK                  | FnTPL, sfTDC, CepTA and yahK              | this study       |
| <i>E. coli</i> (RAL-EFK)          | pRSF-ARO10-LAAD<br>pET-FnTPL-yahK                    | FnTPL, LAAD, ARO10 and yahK               | this study       |
| <i>E. coli</i> (RAL-CFK)          | pRSF-ARO10-LAAD pCDF-<br>FnTPL-yahK                  | FnTPL, LAAD, ARO10 and yahK               | this study       |
| <i>E. coli</i> (EAL-CFK)          | pET-ARO10-LAAD<br>pCDF-FnTPL-yahK                    | FnTPL, LAAD, ARO10 and yahK               | this study       |
| <i>E. coli</i> (EAL-RFK)          | pET-ARO10-LAAD pRSF-<br>FnTPL-yahK                   | FnTPL, LAAD, ARO10 and yahK               | this study       |
| <i>E. coli</i> (CFK-EBC-<br>RAL)  | pET-HpaB-HpaC<br>pRSF-ARO10-LAAD<br>pCDF-FnTPL-yahK  | FnTPL, HpaBC, LAAD, ARO10 and<br>yahK     | this study       |
| <i>E. coli</i> (EFK-CBC-<br>RAL)  | pCDF-HpaB-HpaC<br>pRSF-ARO10-LAAD pET-<br>FnTPL-yahK | FnTPL, HpaBC, LAAD, ARO10 and<br>yahK     | this study       |
| <i>E. coli</i> (RFK-CBC-<br>EAL)  | pCDF-HpaB-HpaC<br>pET-ARO10-LAAD<br>pRSF-FnTPL-yahK  | FnTPL, HpaBC, LAAD, ARO10 and<br>yahK     | this study       |

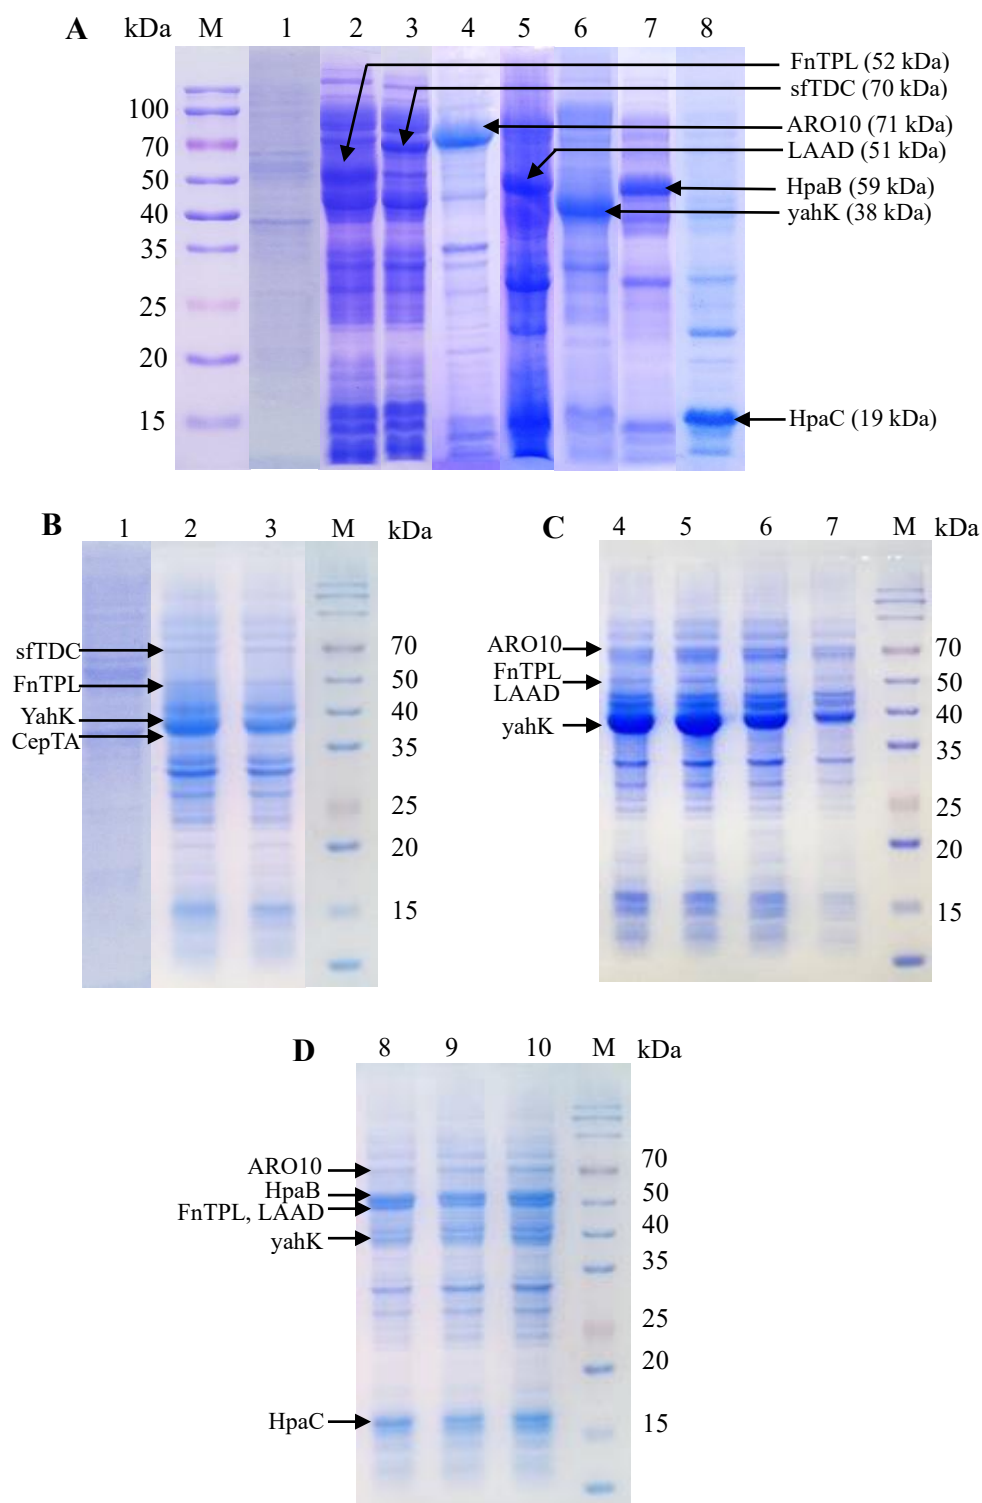

**Figure S1.** SDS-PAGE of the cell-free extracts of recombinant *E. coli* cells co-expression of multiple enzymes. **A:** Lane M: marker, lane 1: *E. coli* (pET28a), lane 2: *E. coli* (FnTPL), lane 3: *E. coli* (sfTDC), lane 4: *E. coli* (ARO10), lane 5: *E. coli* (LAAD), lane 6: *E. coli* (yahK), lane 7: *E. coli* (HpaB), lane 8: *E. coli* (HpaC); **B:** lane 1: *E. coli* (pET28a), lane 2: *E. coli* (CFK-RTA), lane 3: *E. coli* (EFK-RTA); **C:** lane 4: *E. coli* (CFK-EBC-RAL), lane 5: *E. coli* (RFK-CBC-EAL), lane 6: *E. coli* (EFK-CBC-RAL), lane 7: *E. coli* (RFK-EAL); **D:** lane 8: *E. coli* (EFK-RAL), lane 9: *E. coli* (CFK-EAL), lane 10: *E. coli* (CFK-RAL).

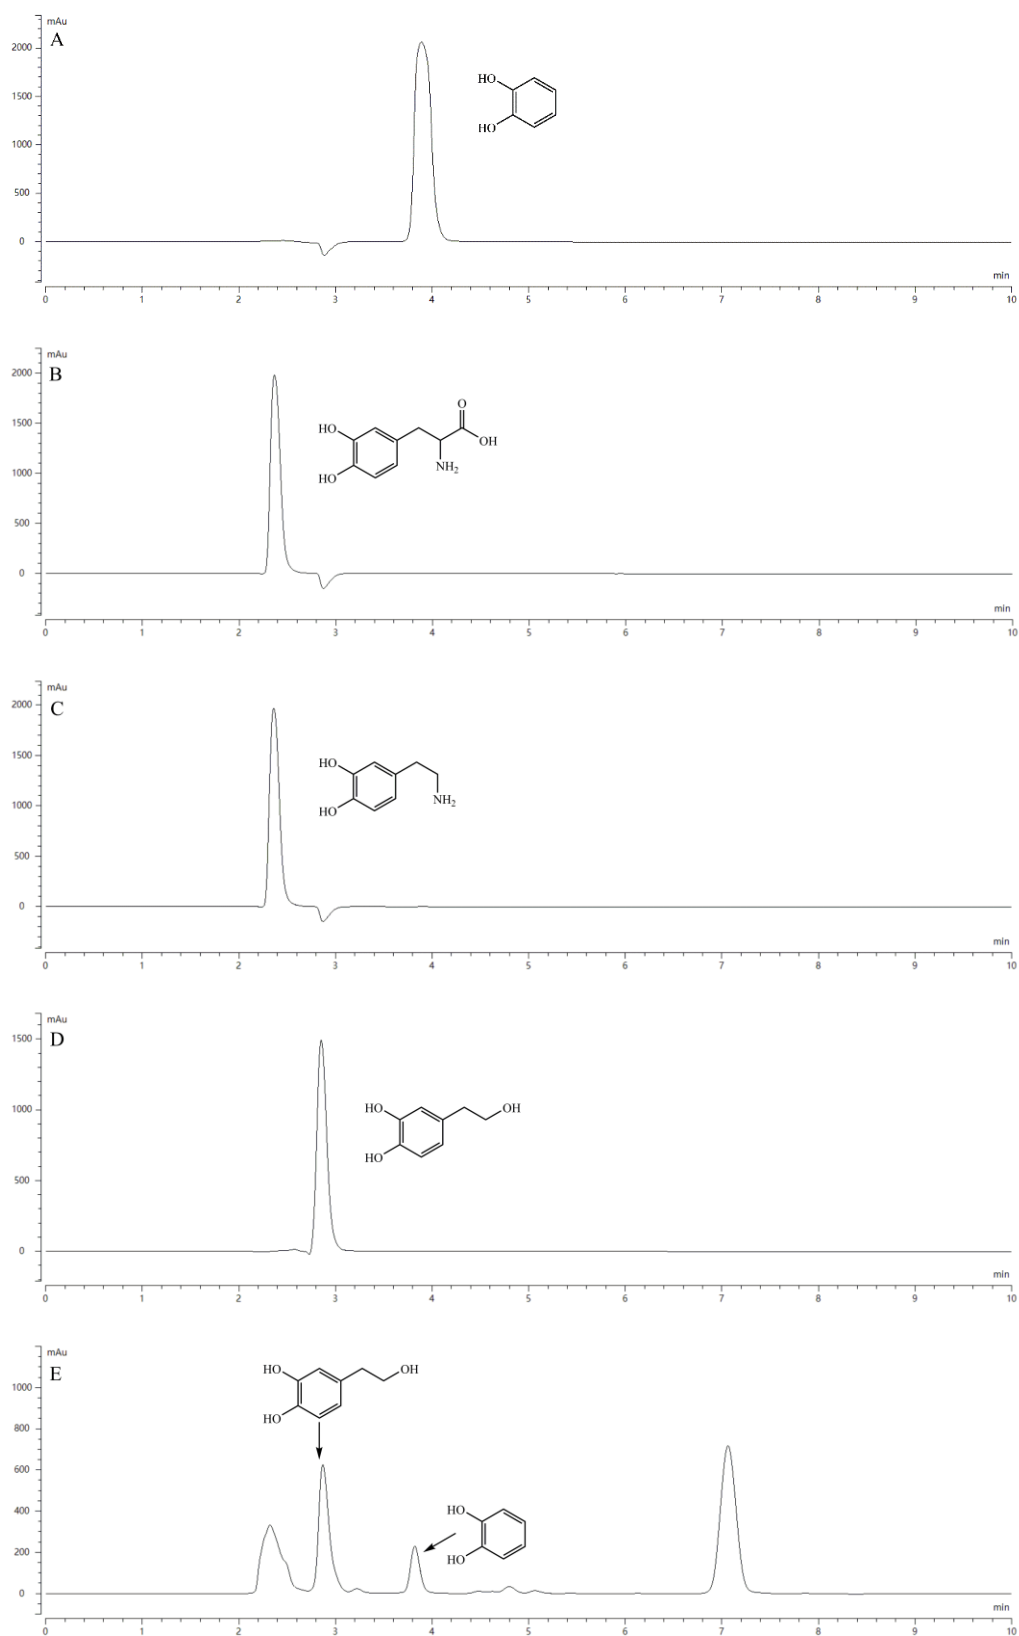

**Figure S2.** HPLC analysis of HT produced from catechol with the system 1. A: Catechol standard; B: L-3,4-dihydroxyphenylalanine standard; C: Dopamine standard; D: HT standard; E: HT produced by conversion of catechol (10 mM) with the resting cells of *E. coli* (CFK-RTA) (15 g cdw/L) at 24 h.

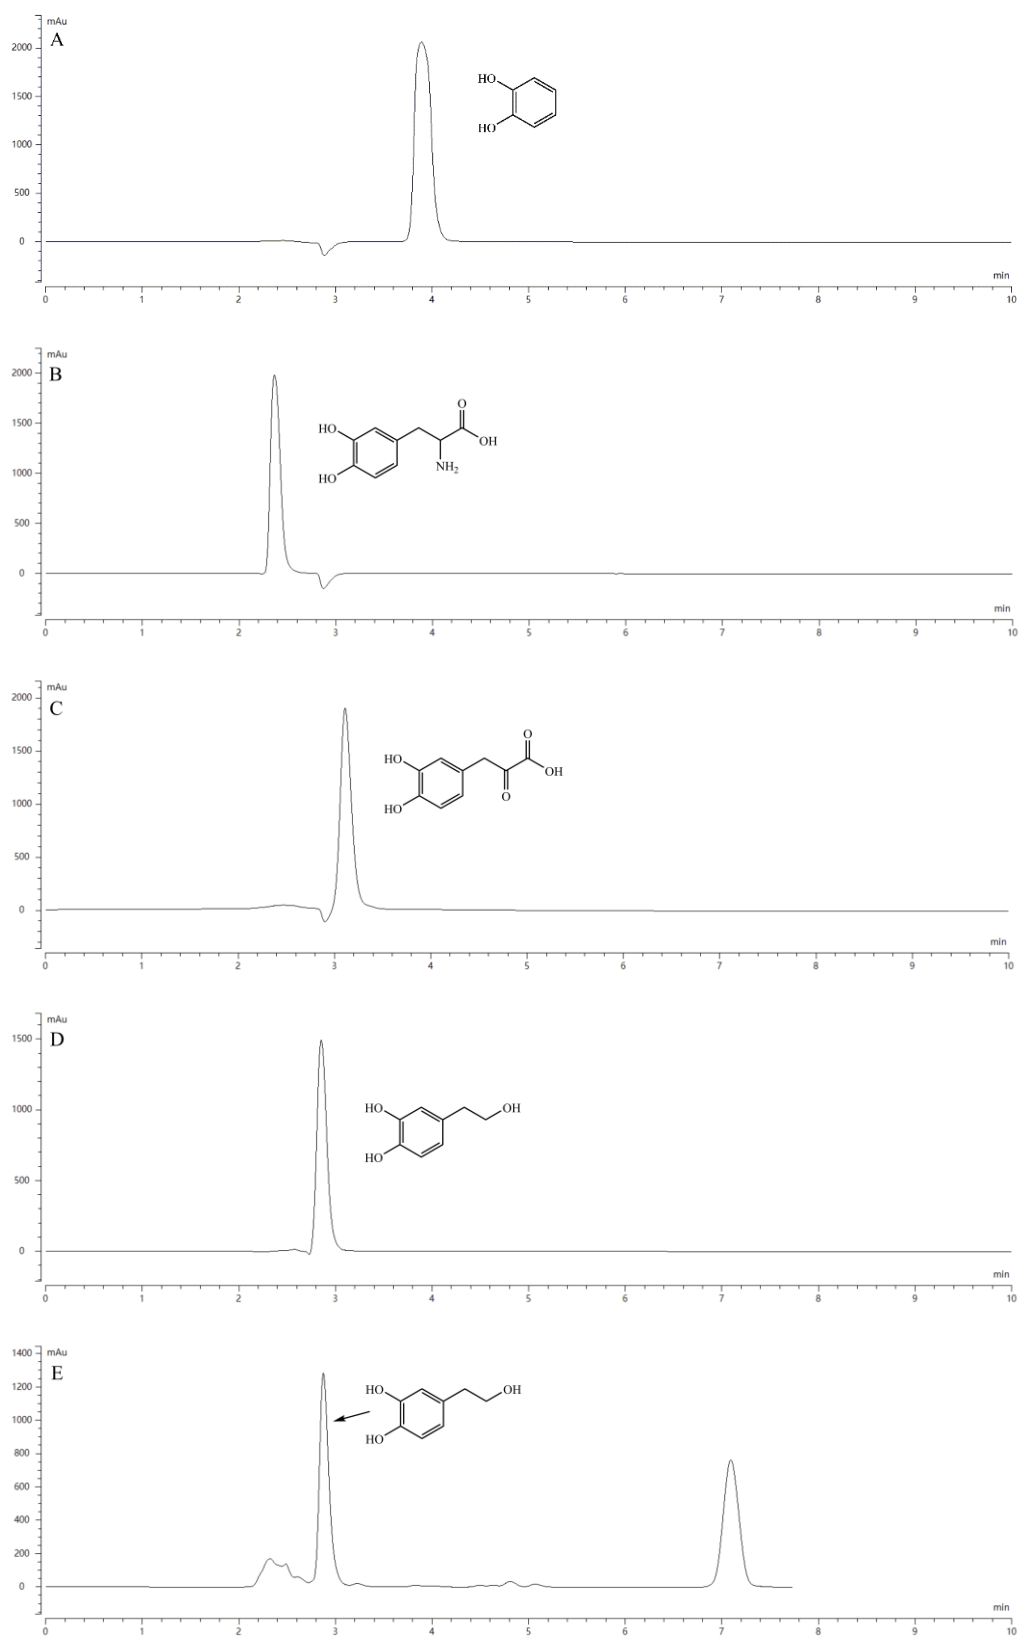

**Figure S3.** HPLC analysis of HT produced from catechol with the system 2. A: Catechol standard; B: L-3,4-dihydroxyphenylalanine standard; C: 3,4-Dihydroxyphenylpyruvic acid standard; D: HT standard; E: HT produced by conversion of catechol (10 mM) with the resting cells of *E. coli* (RFK-EAL) (15 g cdw/L) at 24 h.

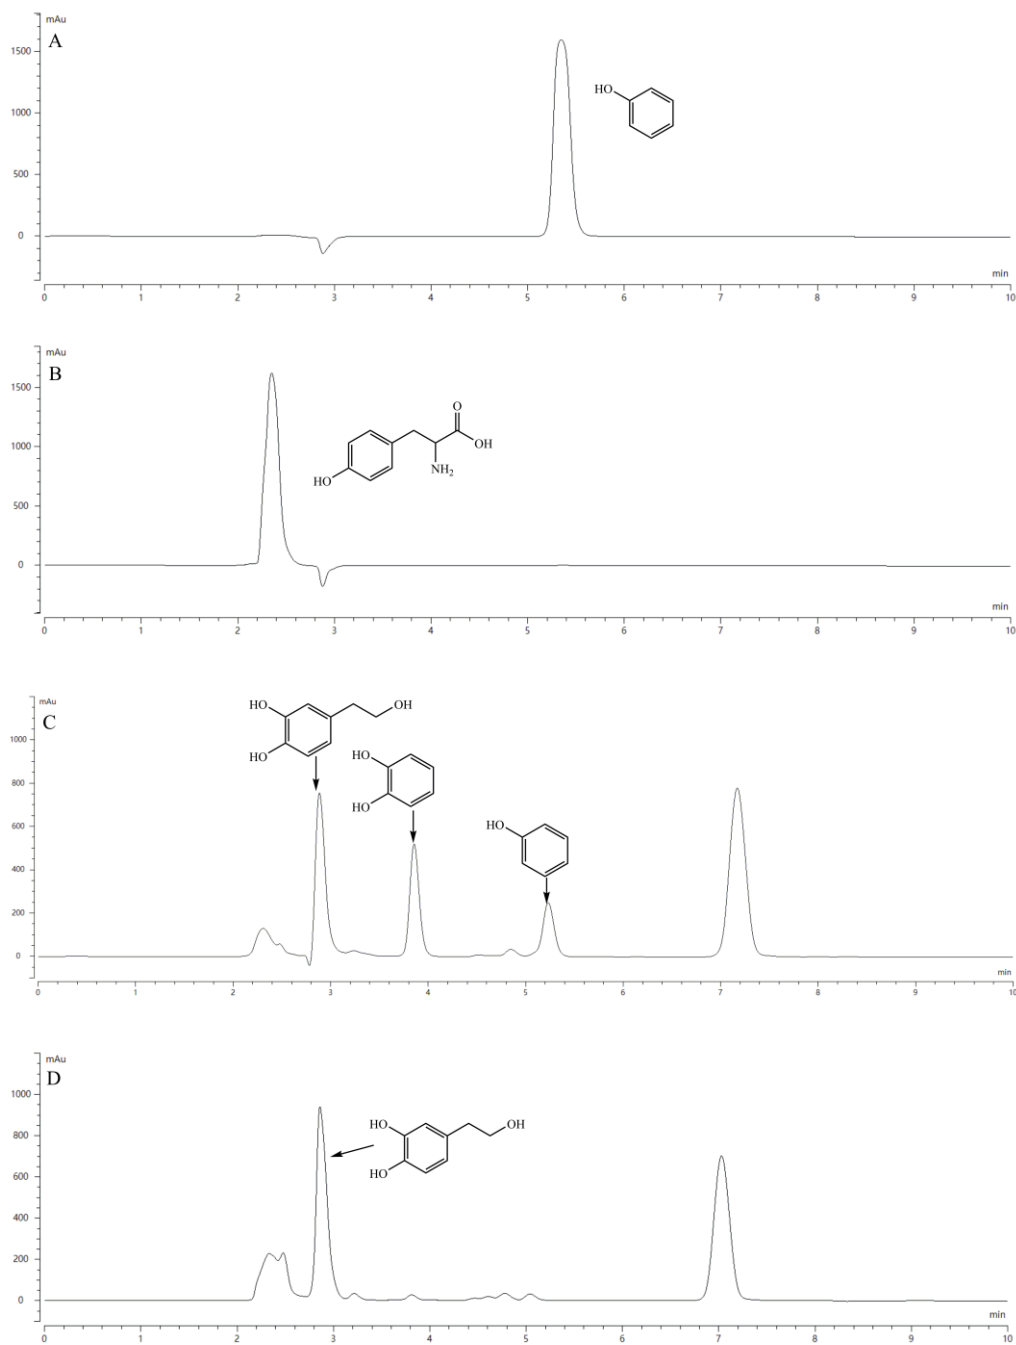

**Figure S4.** HPLC analysis of HT produced from phenol with the system 3. A: phenol standard; B: L-Tyrosine standard; C: HT produced by conversion of phenol (10 mM) with resting cells of *E. coli* (CFK-EBC-RAL) (25 g cdw/L) at 6 h. D: HT produced by conversion of phenol (10 mM) with resting cells of *E. coli* (CFK-EBC-RAL) (25 g cdw/L) at 24 h.

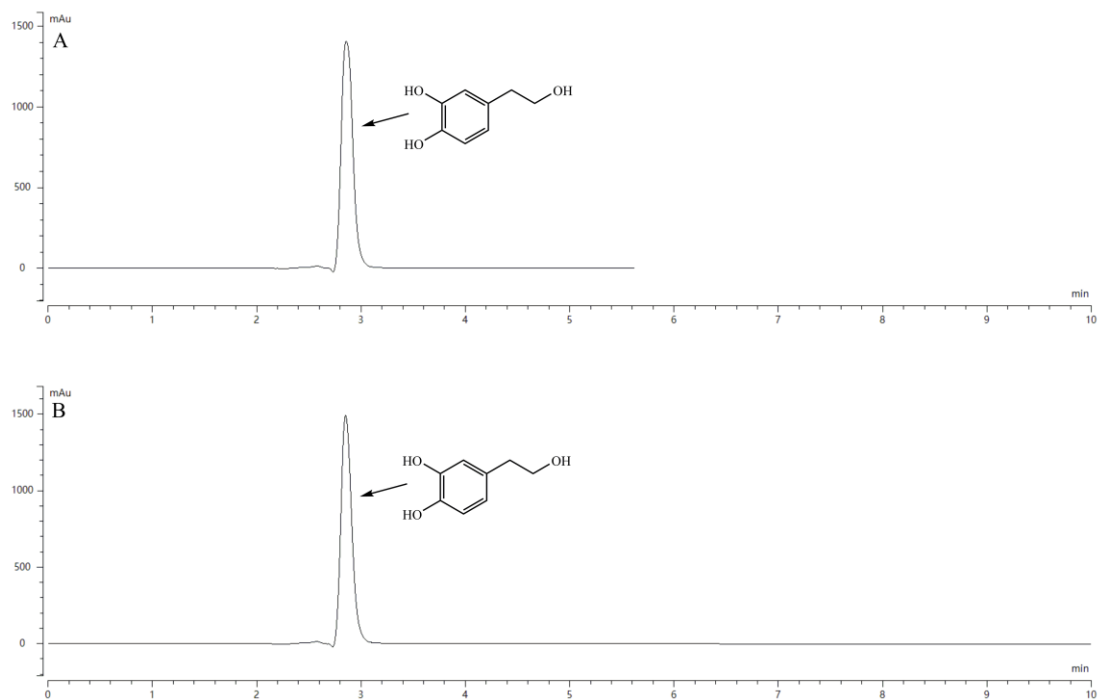

**Figure S5.** HPLC analysis of HT prepared from catechol (A) and phenol (B). A: HT prepared from catechol with the recombinant *E. coli* (RFK-EAL) resting cells. B: HT prepared from phenol with the recombinant *E. coli* (CFK-EBC-RAL) resting cells.

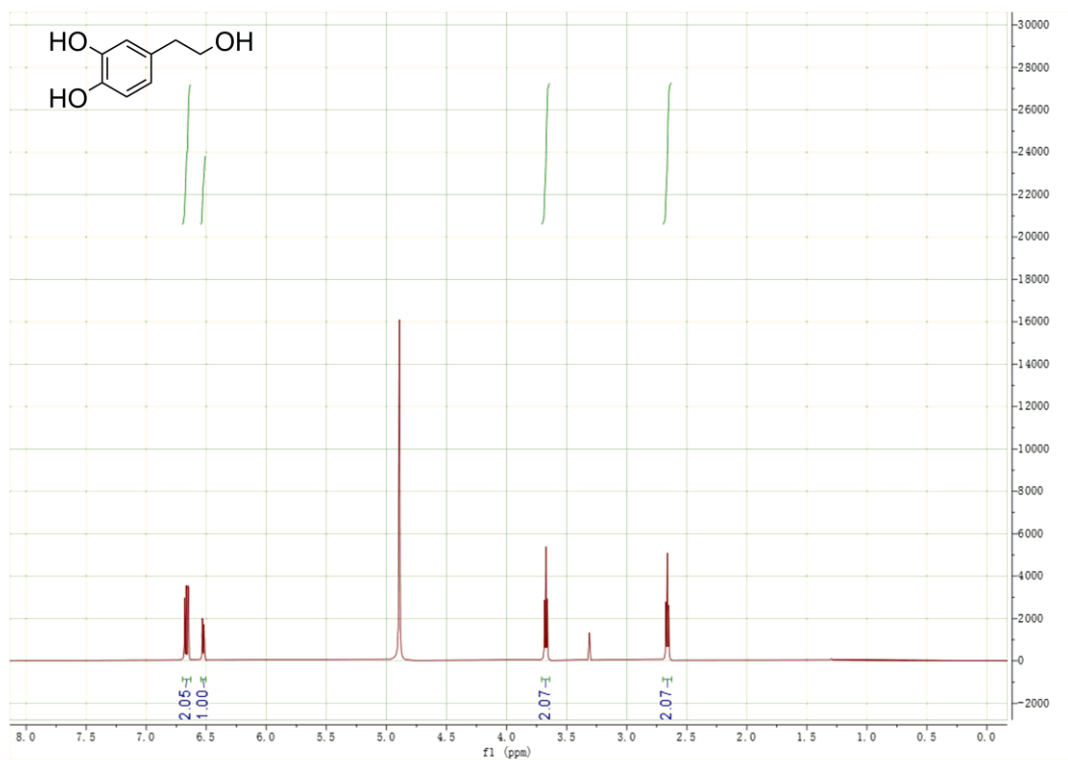

**Figure S6.** <sup>1</sup>H NMR spectra analysis of HT.



## References

- [1] R. C. Zheng, X. L. Tang, H. Suo, L. L. Feng, X. Liu, J. Yang, Y. G. Zheng, *Enzyme Microb. Tech.*, 2018, **112**, 88–93.
- [2] S. G. Lee, S. P. Hong, M. H. Sung, *Enzyme Microb. Tech.*, 1999, **25**, 298–302.
- [3] Z. Vuralhan, M. A. Morais, S. L. Tai, M. D. W. Piper, J. T. Pronk, *Appl. Environ. Microbiol.*, 2003, **69**, 4534–4541.
- [4] Y. Hou, G. S. Hossain, J. Li, H. D. Shin, L. Liu, G. Du, *Appl. Microbiol. Biotechnol.*, 2015, **99**, 8391–8402.
- [5] J. Huo, Y. Bai, T. P. Fan, X. Zheng, Y. Cai, *Process Biochem.*, 2022, **122**, 275–281
- [6] B. Zeng, Y. Lai, L. Liu, J. Cheng, Y. Zhang, J. Yuan, *J. Agric. Food Chem.*, 2020, **68**, 7691–7696
